# Supplementary material for: Heavy Metal Contamination and Cancer Risk Assessment in Groundwater Near Dumpsites: Health Implications for Vulnerable Populations in Nigeria
Source: Research Square preprint supplement (doi:10.21203/rs.3.rs-5753074/v1), 2025-01-15
Supplement: Supplementary file 1 [file 2aa8451aab44216de3f33f93.xlsx]

## Sheet: ikhueniro PUB
		ADULTS INGESTION																			CHILDREN INGESTION
	CM	EF		ED	IR	BW	AT	CF	CDIoral	RfD	THQ	CSF	ILCR					Metals	CW	EF	ED	IR	BW	AT	CF	CDIoral	RfD	THQ	CSF
Copper	0.432986	365		30	2	60	10950		0.0144329	0.04	0.360822							Copper	0.432986	365	6	1	10	2190		0.0432986	0.04	1.08247
Iron	1.05049	365		30	2	60	10950		0.0350162	0.7	0.0500231							Iron	1.05049	365	6	1	10	2190		0.105049	0.7	0.150069
Zinc	0.483	365		30	2	60	10950		0.0161	0.3	0.0536667							Zinc	0.483	365	6	1	10	2190		0.0483	0.3	0.161
Lead	0.0205556	365		30	2	60	10950		0.000685185	0.0035	0.195767	0.0085	5.82407e-06					Lead	0.0205556	365	6	1	10	2190		0.00205556	0.0035	0.587302	0.0085	1.74722e-05	4.25e-06
Chromium	0.0261111	365		30	2	60	10950		0.00087037	0.003	0.290123	0.42	0.000365556					Chromium	0.0261111	365	6	1	10	2190		0.00261111	0.003	0.87037	0.42	0.00109667	0.000504
Nickel	0.0235278	365		30	2	60	10950		0.000784259	0.02	0.039213	0.91	0.000713676					Nickel	0.0235278	365	6	1	10	2190		0.00235278	0.02	0.117639	0.91	0.00214103	0.0013195
											0.989615																	2.96885
																			THQ	Adult	Child	Infant	Targe value
																			Copper	0.360822	1.08247	1.6237	1
																			Iron	0.0500231	0.150069	0.225104	1
																			Zinc	0.0536667	0.161	0.2415	1
																			Lead	0.195767	0.587302	0.880952	1
																			Chromium	0.290123	0.87037	1.30556	1
																			Nickel	0.039213	0.117639	0.176458	1
																			ILCR	Adults	Child	Infants	Targe value
																			Lead	5.82407e-06	1.74722e-05	0.000262083	0.0001
																			Chromium	0.000365556	0.00109667	0.00195833	0.0001
																S			Nickel	0.000713676	0.00214103	0.00321154	0.0001
		INFANTS INGESTION
	CM	EF		ED	IR	BW	AT	CF	CDIoral	RfD	THQ	CSF	ILCR
Copper	0.432986	365		1	0.75	5	365		0.0649479	0.04	1.6237								Copper	0.0260417
Iron	1.05049	365		1	0.75	5	365		0.157573	0.7	0.225104								Iron	0.0108333
Zinc	0.483	365		1	0.75	5	365		0.07245	0.3	0.2415								Zinc	0.0304167
Lead	0.0205556	365		1	0.75	5	365		0.00308333	0.0035	0.880952	0.085	0.000262083	6.8e-06	4.25e-06				Lead	0.119048
Chromium	0.0261111	365		1	0.75	5	365		0.00391667	0.003	1.30556	0.5	0.00195833	0.0008064	0.000504				Chromium	0.000666667
Nickel	0.0235278	365		1	0.75	5	365		0.00352917	0.02	0.176458	0.91	0.00321154	0.0021112	0.0013195				Nickel	0.0604167
											4.45327
																							0.1	0.001	0.0001
																												ILCR	Adults	Child	Infants
																												Lead	5.82407e-06	1.74722e-05	0.000262083	9.51265e-05
																												Chromium	0.000365556	0.00109667	0.00195833	0.00114019
																												Nickel	0.000713676	0.00214103	0.00321154	0.00202208
																												ILCR
																												Lead	9.51265e-05
																												Chromium	0.00114019
																												Nickel	0.00202208
																																															Infants
																																															49.9111
																																															2.60559
																																															1.31453
																																															0
																																															0
																																															0.0575108
																																															7.08615
																																															39.0252

## Sheet: Otofure PUB
		ADULTS INGESTION																		CHILDREN INGESTION
	CM	EF	ED	IR	BW	AT	CF	CDIoral	RfD	THQ	CSF	ILCR					Metals	CW	EF	ED	IR	BW	AT	CF	CDIoral	RfD	THQ	CSF					Cu	0.025	0.52	0.045	0.167	0.375	0.058	0.324							CANCER RISK ingestion
Copper	0.0256528	365	54.33	2	60	19830.5		0.000855093	0.04	0.0213773							Copper	0.0256528	365	10	1	10	3650		0.00256528	0.04	0.0641319						Fe	182	1.07	0.469	0.369	1.142	0.423	0.296
Iron	0.511021	365	54.33	2	60	19830.5		0.017034	0.7	0.0243343							Iron	0.511021	365	10	1	10	3650		0.0511021	0.7	0.073003						Zn	0.219	0.333	0.091	0.144	0.524	0.058	0.064							Adults	Children	infants
Zinc	0.149111	365	54.33	2	60	19830.5		0.00497037	0.3	0.0165679							Zinc	0.149111	365	10	1	10	3650		0.0149111	0.3	0.0497037						Cd	0.028												Cd	0	0	0
Lead	0.00711111	365	54.33	2	60	19830.5		0.000237037	0.0035	0.0677249	0.0085	2.01481e-06					Lead	0.00711111	365	10	1	10	3650		0.000711111	0.0035	0.203175	0.0085	6.04444e-06	8.5e-06			Cr	0.024	0.019	0.019	0.017	0.017	0.028	0.014						Cr	0.000266	0.000399	0.0009975
Chromium	0.0508194	365	54.33	2	60	19830.5		0.00169398	0.003	0.56466	0.42	0.000711472					Chromium	0.0508194	365	10	1	10	3650		0.00508194	0.003	1.69398	0.42	0.00213442	0.000399			Ni	0.029	0.021	0.023	0.019	0.23	0.021	0.023						Ni	0.000637	0.0009555	0.00238875
Nickel	0.0254028	365	54.33	2	60	19830.5		0.000846759	0.02	0.042338	0.91	0.000770551					Nickel	0.0254028	365	10	1	10	3650		0.00254028	0.02	0.127014	0.91	0.00231165	0.0009555			Co	0.005	0.016	0.016	0.025	0.23	0.029	0.019
										0.737003																	2.21101
		INFANTS INGESTION														Dumpsite
	CM	EF	ED	IR	BW	AT	CF	CDIoral	RfD	THQ	CSF	ILCR				HIingestion
Copper	0.0256528	365	2	0.75	6	730		0.0032066	0.04	0.0801649						Adults	Children	Infants												Adult	Child	Infant	Target value
Iron	0.511021	365	2	0.75	6	730		0.0638776	0.7	0.0912537						1.38744	2.21991	1.1562											Copper	0.0213773	0.0641319	0.0801649	1
Zinc	0.149111	365	2	0.75	6	730		0.0186389	0.3	0.0621296																			Iron	0.0243343	0.073003	0.0912537	1
Lead	0.00711111	365	2	0.75	6	730		0.000888889	0.0035	0.253968	0.0085	7.55556e-06	1.36e-05	8.5e-06															Zinc	0.0165679	0.0497037	0.0621296	1
Chromium	0.0508194	365	2	0.75	6	730		0.00635243	0.003	2.11748	0.42	0.00266802	0.0006384	0.000399		Hidermal													Lead	0.0677249	0.203175	0.253968	1
Nickel	0.0254028	365	2	0.75	6	730		0.00317535	0.02	0.158767	0.91	0.00288957	0.0015288	0.0009555		Adults	Children	Infants											Chromium	0.56466	1.69398	2.11748	1
										2.76376																			Nickel	0.042338	0.127014	0.158767	1
																														Adult	Child	Infant	Target value
																													Ikhueniro	0.989615	2.96885	4.45327	1
																													Otofure	0.737003	2.21101	2.76376	1
																																			Adult	Child	Infant
																																		Lead	2.01481e-06	2.41778e-06	7.55556e-06	3.99605e-06
																			Adult	Child	Infant	Target value												Chromium	0.000711472	0.000853767	0.00266802	0.00141109
																		Lead	2.01481e-06	6.04444e-06	7.55556e-06	0.0001												Nickel	0.000770551	0.000924661	0.00288957	0.00152826
																		Chromium	0.000711472	0.00213442	0.00266802	0.0001
																		Nickel	0.000770551	0.00231165	0.00288957	0.0001
																																		Lead	3.99605e-06
																																		Chromium	0.00141109
																																		Nickel	0.00152826
[truncated: 2 more columns]
