# Supplementary material for: Heavy Metal Contamination and Cancer Risk Assessment in Groundwater Near Dumpsites: Health Implications for Vulnerable Populations in Nigeria
Source: Research Square preprint supplement (doi:10.21203/rs.3.rs-5753074/v1), 2025-01-15
Supplement: Supplementary file 2 [file fef87dd58943994e5d8bad10.xlsx]

## Sheet: MEAN SD MAX MIN
	Ikhueniro	July 218	August 2018	September 2018	Station 1					Ikhueniro	July 218	August 2018	September 2018	Station 2					Ikhueniro	July 218	August 2018	September 2018	Station 3				Ikhueniro	July 218	August 2018	September 2018	Station 4				Ikhueniro	July 218	August 2018	September 2018	Station 5				Ikhueniro	July 218	August 2018	September 2018	Station 6
Parameter					mean	SDV	MAX	MIN					mean	SDV	MAX	MIN						mean	SDV	MAX	MIN					mean	SDV	MAX	MIN					mean	SDV	MAX	MIN					mean	SDV	MAX	MIN
Pb	mg/l	0.02	0.003	0.025	0.016	0.00866667	0.025	0.003		0.03	0.011	0.024	0.0216667	0.00711111	0.03	0.011			0.024	0.026	0.031	0.027	0.00266667	0.031	0.024		0.019	0.01	0.013	0.014	0.00333333	0.019	0.01		0.006	0.01	0.013	0.00966667	0.00244444	0.013	0.006		0.008	0.009	0.006	0.00766667	0.00111111	0.009	0.006
Zn	mg/l	0.32	0.205	0.47	0.331667	0.0922222	0.47	0.205		0.422	0.346	0.289	0.352333	0.0464444	0.422	0.289			0.114	0.117	0.21	0.147	0.042	0.21	0.114		0.294	0.282	0.03	0.202	0.114667	0.294	0.03		0.143	0.25	0.2	0.197667	0.0364444	0.25	0.143		0.264	0.27	0.3	0.278	0.0146667	0.3	0.264
Cd	mg/l	BDL	BDL	BDL	#DIV/0!	#NUM!	0	0		BDL	BDL	BDL	#DIV/0!	#NUM!	0	0			BDL	BDL	BDL	#DIV/0!	#NUM!	0	0		BDL	BDL	BDL	#DIV/0!	#NUM!	0	0		BDL	BDL	BDL	#DIV/0!	#NUM!	0	0		BDL	BDL	BDL	#DIV/0!	#NUM!	0	0
Cr	mg/l	0.023	0.01	0.18	0.071	0.0726667	0.18	0.01		0.016	0.018	0.016	0.0166667	0.000888889	0.018	0.016			0.018	0.019	0.21	0.0823333	0.0851111	0.21	0.018		0.017	0.021	0.018	0.0186667	0.00155556	0.021	0.017		0.028	0.022	0.021	0.0236667	0.00288889	0.028	0.021		0.016	0.02	0.017	0.0176667	0.00155556	0.02	0.016
Fe	mg/l	0.886	1.116	1.4	1.134	0.177333	1.4	0.886		1.292	1.266	1.3	1.286	0.0133333	1.3	1.266			1.233	1.24	1	1.15767	0.105111	1.24	1		0.64	0.476	0.76	0.625333	0.0995556	0.76	0.476		0.854	0.787	0.69	0.777	0.058	0.854	0.69		0.883	0.89	0.85	0.874333	0.0162222	0.89	0.85
Ni	mg/l	0.022	0.033	0.029	0.028	0.004	0.033	0.022		0.016	0.02	0.018	0.018	0.00133333	0.02	0.016			0.022	0.014	0.26	0.0986667	0.107556	0.26	0.014		0.016	0.013	0.015	0.0146667	0.00111111	0.016	0.013		0.018	0.019	0.015	0.0173333	0.00155556	0.019	0.015		0.017	0.015	0.021	0.0176667	0.00222222	0.021	0.015
Cu	mg/l	0.558	0.56	0.6	0.572667	0.0182222	0.6	0.558		0.486	0.51	0.39	0.462	0.048	0.51	0.39			0.581	0.45	0.35	0.460333	0.0804444	0.581	0.35		0.631	0.564	0.47	0.555	0.0566667	0.631	0.47		0.686	0.62	0.67	0.658667	0.0257778	0.686	0.62		0.551	0.65	0.47	0.557	0.062	0.65	0.47
STATION 2
		Otofure	July 218	August 2018	September 2018	Station 1					Otofure	July 218	August 2018	September 2018	Station 2					Otofure	July 218	August 2018	September 2018	Station 3				Otofure	July 218	August 2018	September 2018	Station 4				Otofure	July 218	August 2018	September 2018	Station 5				Otofure	July 218	August 2018	September 2018	Station 6
Parameter					mean	SDV	MAX	MIN					mean	SDV	MAX	MIN						mean	SDV	MAX	MIN					mean	SDV	MAX	MIN					mean	SDV	MAX	MIN					mean	SDV	MAX	MIN
Pb	mg/l	0.006	0.008	0.01	0.008	0.00133333	0.01	0.006		0.004	0.005	0.007	0.00533333	0.00111111	0.007	0.004			0.009	0.007	0.007	0.00766667	0.000888889	0.009	0.007		0.01	0.008	0.006	0.008	0.00133333	0.01	0.006		0.005	0.007	0.004	0.00533333	0.00111111	0.007	0.004		0.005	0.013	0.007	0.00833333	0.00311111	0.013	0.005
Zn	mg/l	0.04	0.045	0.039	0.0413333	0.00244444	0.045	0.039		0.018	0.02	0.027	0.0216667	0.00355556	0.027	0.018			0.065	0.054	0.057	0.0586667	0.00422222	0.065	0.054		0.098	0.1	0.087	0.095	0.00533333	0.1	0.087		0.122	0.127	0.098	0.115667	0.0117778	0.127	0.098		0.173	0.175	0.22	0.189333	0.0204444	0.22	0.173
Cd	mg/l	BDL	BDL	BDL	#DIV/0!	#NUM!	0	0		BDL	BDL	BDL	#DIV/0!	#NUM!	0	0			BDL	BDL	BDL	#DIV/0!	#NUM!	0	0		BDL	BDL	BDL	#DIV/0!	#NUM!	0	0		BDL	BDL	BDL	#DIV/0!	#NUM!	0	0		BDL	BDL	BDL	#DIV/0!	#NUM!	0	0
Cr	mg/l	0.017	0.019	0.021	0.019	0.00133333	0.021	0.017		0.427	0.454	0.52	0.467	0.0353333	0.52	0.427			0.019	0.01	0.014	0.0143333	0.00311111	0.019	0.01		0.02	0.021	0.017	0.0193333	0.00155556	0.021	0.017		0.023	0.019	0.017	0.0196667	0.00222222	0.023	0.017		0.02	0.021	0.023	0.0213333	0.00111111	0.023	0.02
Fe	mg/l	0.398	0.4	0.38	0.392667	0.00844444	0.4	0.38		0.021	0.025	0.03	0.0253333	0.00311111	0.03	0.021			0.5	0.543	0.48	0.507667	0.0235556	0.543	0.48		0.587	0.602	0.054	0.414333	0.240222	0.602	0.054		0.598	0.545	0.62	0.587667	0.0284444	0.62	0.545		0.621	0.618		0.6195	0.0015	0.621	0.618
Ni	mg/l	0.02	0.022	0.047	0.0296667	0.0115556	0.047	0.02		0.013	0.015	0.018	0.0153333	0.00177778	0.018	0.013			0.027	0.024	0.05	0.0336667	0.0108889	0.05	0.024		0.027	0.023	0.036	0.0286667	0.00488889	0.036	0.023		0.024	0.026	0.067	0.039	0.0186667	0.067	0.024		0.021	0.02	0.054	0.0316667	0.0148889	0.054	0.02
Cu	mg/l	0.017	0.015	0.04	0.024	0.0106667	0.04	0.015		0.037	0.035	0.29	0.120667	0.112889	0.29	0.035			0.014	0.011	0.048	0.0243333	0.0157778	0.048	0.011		0.014	0.017	0.08	0.037	0.0286667	0.08	0.014		0.015	0.014	0.03	0.0196667	0.00688889	0.03	0.014		0.01	0.013	0.049	0.024	0.0166667	0.049	0.01

## Sheet: MEAN FOR DIFF STATN
					WET																				DRY
	IKH 1	IKH 2	IKH 3	IKH 4	IKH 5	IKH 6	IKH 7	IKH 8	IKH 9	IKH 10	IKH 11	IKH 12									IKH 1	IKH 2	IKH 3	IKH 4	IKH 5	IKH 6	IKH 7	IKH 8	IKH 9	IKH 10	IKH 11	IKH 12
Parameter	mean	mean	mean	mean	mean	mean	mean	mean	mean	mean	mean	mean	TOTAL MEAN	STD	MAX	MIN					mean	mean	mean	mean	mean	mean	mean	mean	mean	mean	mean	mean	TOTAL MEAN	STD	MAX	MIN
Pb	0.016	0.0216667	0.027	0.014	0.00966667	0.00766667	0.0273333	0.0253333	0.029	0.0296667	0.023	0.0226667	0.0210833	0.00569231	0.0296667	0.00766667					0.022	0.03	0.0256667	0.0156667	0.013	0.0363333	0.016	0.0146667	0.0153333	0.021	0.0146667	0.016	0.0200278	0.00536325	0.0363333	0.013
Zn	0.331667	0.352333	0.147	0.202	0.197667	0.278	0.326333	0.251667	0.4	0.353333	0.273667	0.491667	0.300444	0.069641	0.491667	0.147					0.363333	0.257	0.508333	0.39	0.253667	0.493333	1.07667	1.25667	0.873333	1.21667	0.966	0.331667	0.665556	0.317162	1.25667	0.253667
Cd	#DIV/0!	#DIV/0!	#DIV/0!	#DIV/0!	#DIV/0!	#DIV/0!	#DIV/0!	#DIV/0!	#DIV/0!	#DIV/0!	#DIV/0!	#DIV/0!	#DIV/0!	#DIV/0!	#DIV/0!	#DIV/0!					#DIV/0!	#DIV/0!	#DIV/0!	#DIV/0!	#DIV/0!	#DIV/0!	#DIV/0!	#DIV/0!	#DIV/0!	#DIV/0!	#DIV/0!	#DIV/0!	#DIV/0!	#DIV/0!	#DIV/0!	#DIV/0!
Cr	0.071	0.0166667	0.0823333	0.0186667	0.0236667	0.0176667	0.0146667	0.0213333	0.019	0.0173333	0.024	0.017	0.0286111	0.0147863	0.0823333	0.0146667					0.0176667	0.0226667	0.017	0.0206667	0.0253333	0.017	0.0203333	0.0203333	0.0146667	0.019	0.0176667	0.071	0.0236111	0.00755556	0.071	0.0146667
Fe	1.134	1.286	1.15767	0.625333	0.777	0.874333	0.769333	0.988	0.727	1.17533	1.527	1.74367	1.06539	0.250974	1.74367	0.625333					1.03933	1.09033	1.23033	0.963333	0.956333	1.04333	1.02667	1.22	0.86	1.1	0.763333	1.134	1.03558	0.0935769	1.23033	0.763333
Ni	0.028	0.018	0.0986667	0.0146667	0.0173333	0.0176667	0.0233333	0.024	0.0216667	0.0253333	0.0236667	0.0216667	0.0278333	0.0109231	0.0986667	0.0146667					0.021	0.02	0.0186667	0.019	0.0223333	0.0213333	0.0213333	0.0206667	0.0116667	0.0146667	0.012	0.028	0.0192222	0.00309402	0.028	0.0116667
Cu	0.572667	0.462	0.460333	0.555	0.658667	0.557	0.517333	0.567667	0.517	0.501	0.491	0.521333	0.53175	0.0388077	0.658667	0.460333					0.504	0.439	0.483667	0.429333	0.465333	0.492333	0.5	0.0276667	0.016	0.026	0.0946667	0.532667	0.334222	0.180393	0.532667	0.016
STATION 2				WET																				DRY
	OTF1	OTF2	OTF3	OTF4	OTF5	OTF6	OTF7	OTF8	OTF9	OTF10	OTF11	OTF12									OTF1	OTF2	OTF3	OTF4	OTF5	OTF6	OTF7	OTF8	OTF9	OTF10	OTF11	OTF12
Parameter	mean	mean	mean	mean	mean	mean	mean	mean	mean	mean	mean	mean	TOTAL MEAN	STD	MAX	MIN					mean	mean	mean	mean	mean	mean	mean	mean	mean	mean	mean	mean	TOTAL MEAN	STD	MAX	MIN
Pb	0.008	0.00533333	0.00766667	0.008	0.00533333	0.00833333	0.00433333	0.007	0.007	0.00666667	0.002	0.018	0.00730556	0.00207265	0.018	0.002					0.006	0.007	0.00733333	0.009	0.00366667	0.003	0.003	0.00366667	0.0196667	0.0133333	0.003	0.00433333	0.00691667	0.00334615	0.0196667	0.003
Zn	0.0413333	0.0216667	0.0586667	0.095	0.115667	0.189333	0.139333	0.122	0.148667	0.0836667	0.153667	0.103333	0.106028	0.0357692	0.189333	0.0216667					0.152667	0.168667	0.142	0.159	0.133667	0.15	0.163333	0.28	0.23	0.23	0.257	0.24	0.192194	0.0424658	0.28	0.133667
Cd	#DIV/0!	#DIV/0!	#DIV/0!	#DIV/0!	#DIV/0!	#DIV/0!	#DIV/0!	#DIV/0!	#DIV/0!	#DIV/0!	#DIV/0!	#DIV/0!	#DIV/0!	#DIV/0!	#DIV/0!	#DIV/0!					#DIV/0!	#DIV/0!	#DIV/0!	#DIV/0!	#DIV/0!	#DIV/0!	#DIV/0!	#DIV/0!	#DIV/0!	#DIV/0!	#DIV/0!	#DIV/0!	#DIV/0!	#DIV/0!	#DIV/0!	#DIV/0!
Cr	0.019	0.467	0.0143333	0.0193333	0.0196667	0.0213333	0.0166667	0.0276667	0.02	0.0173333	0.0233333	0.026	0.0576389	0.0629786	0.467	0.0143333					0.013	0.0746667	0.101333	0.0216667	0.023	0.0156667	0.0263333	0.0966667	0.089	0.025	0.023	0.0186667	0.044	0.0285641	0.101333	0.013
Fe	0.392667	0.0253333	0.507667	0.414333	0.587667	0.6195	0.517333	0.614667	0.564333	0.507	0.551333	0.533667	0.486292	0.096391	0.6195	0.0253333					0.577333	0.594667	0.581	0.543667	0.558	0.517	0.483333	0.57	0.563333	0.493333	0.473333	0.474	0.53575	0.0365769	0.594667	0.473333
Ni	0.0296667	0.0153333	0.0336667	0.0286667	0.039	0.0316667	0.023	0.0293333	0.0246667	0.024	0.0216667	0.0226667	0.0269444	0.00466667	0.039	0.0153333					0.0273333	0.0293333	0.02	0.02	0.0233333	0.0226667	0.023	0.023	0.023	0.0223333	0.0263333	0.026	0.0238611	0.00208547	0.0293333	0.02
Cu	0.024	0.120667	0.0243333	0.037	0.0196667	0.024	0.0156667	0.02	0.023	0.0163333	0.0256667	0.0236667	0.0311667	0.0146667	0.120667	0.0156667					0.022	0.02	0.023	0.018	0.0183333	0.0236667	0.0136667	0.02	0.0206667	0.0183333	0.0213333	0.0226667	0.0201389	0.00192308	0.0236667	0.0136667

## Sheet: Overall mean
					WET																				DRY
	IKH 1	IKH 2	IKH 3	IKH 4	IKH 5	IKH 6	IKH 7	IKH 8	IKH 9	IKH 10	IKH 11	IKH 12	IKH 1	IKH 2	IKH 3	IKH 4	IKH 5	IKH 6	IKH 7	IKH 8	IKH 9	IKH 10	IKH 11	IKH 12	Mean	SD	MIN	MAX
Parameter	mean	mean	mean	mean	mean	mean	mean	mean	mean	mean	mean	mean	mean	mean	mean	mean	mean	mean	mean	mean	mean	mean	mean	mean
Pb	0.016	0.0216667	0.027	0.014	0.00966667	0.00766667	0.0273333	0.0253333	0.029	0.0296667	0.023	0.0226667	0.022	0.03	0.0256667	0.0156667	0.013	0.0363333	0.016	0.0146667	0.0153333	0.021	0.0146667	0.016	0.0205556	0.00612037	0.00766667	0.0363333
Zn	0.331667	0.352333	0.147	0.202	0.197667	0.278	0.326333	0.251667	0.4	0.353333	0.273667	0.491667	0.363333	0.257	0.508333	0.39	0.253667	0.493333	1.07667	1.25667	0.873333	1.21667	0.966	0.331667	0.483	0.251556	0.147	1.25667
Cd	#DIV/0!	#DIV/0!	#DIV/0!	#DIV/0!	#DIV/0!	#DIV/0!	#DIV/0!	#DIV/0!	#DIV/0!	#DIV/0!	#DIV/0!	#DIV/0!	#DIV/0!	#DIV/0!	#DIV/0!	#DIV/0!	#DIV/0!	#DIV/0!	#DIV/0!	#DIV/0!	#DIV/0!	#DIV/0!	#DIV/0!	#DIV/0!	#DIV/0!	#DIV/0!	#DIV/0!	#DIV/0!
Cr	0.071	0.0166667	0.0823333	0.0186667	0.0236667	0.0176667	0.0146667	0.0213333	0.019	0.0173333	0.024	0.017	0.0176667	0.0226667	0.017	0.0206667	0.0253333	0.017	0.0203333	0.0203333	0.0146667	0.019	0.0176667	0.071	0.0261111	0.0121667	0.0146667	0.0823333
Fe	1.134	1.286	1.15767	0.625333	0.777	0.874333	0.769333	0.988	0.727	1.17533	1.527	1.74367	1.03933	1.09033	1.23033	0.963333	0.956333	1.04333	1.02667	1.22	0.86	1.1	0.763333	1.134	1.05049	0.186916	0.625333	1.74367
Ni	0.028	0.018	0.0986667	0.0146667	0.0173333	0.0176667	0.0233333	0.024	0.0216667	0.0253333	0.0236667	0.0216667	0.021	0.02	0.0186667	0.019	0.0223333	0.0213333	0.0213333	0.0206667	0.0116667	0.0146667	0.012	0.028	0.0235278	0.00720833	0.0116667	0.0986667
Cu	0.572667	0.462	0.460333	0.555	0.658667	0.557	0.517333	0.567667	0.517	0.501	0.491	0.521333	0.504	0.439	0.483667	0.429333	0.465333	0.492333	0.5	0.0276667	0.016	0.026	0.0946667	0.532667	0.432986	0.130939	0.016	0.658667
	IKH 1	IKH 2	IKH 3	IKH 4	IKH 5	IKH 6	IKH 7	IKH 8	IKH 9	IKH 10	IKH 11	IKH 12
Pb	0.019	0.0258333	0.0263333	0.0148333	0.0113333	0.022	0.0216667	0.02	0.0221667	0.0253333	0.0188333	0.0193333
Zn	0.3475	0.304667	0.327667	0.296	0.225667	0.385667	0.7015	0.754167	0.636667	0.785	0.619833	0.411667
Cr	0.0443333	0.0196667	0.0496667	0.0196667	0.0245	0.0173333	0.0175	0.0208333	0.0168333	0.0181667	0.0208333	0.044
Fe	1.08667	1.18817	1.194	0.794333	0.866667	0.958833	0.898	1.104	0.7935	1.13767	1.14517	1.43883
Ni	0.0245	0.019	0.0586667	0.0168333	0.0198333	0.0195	0.0223333	0.0223333	0.0166667	0.02	0.0178333	0.0248333
Cu	0.538333	0.4505	0.472	0.492167	0.562	0.524667	0.508667	0.297667	0.2665	0.2635	0.292833	0.527
							Pb	0.019	0.0258333	0.0263333	0.0148333	0.0113333	0.022	0.0216667	0.02	0.0221667	0.0253333	0.0188333	0.0193333
							Zn	0.3475	0.304667	0.327667	0.296	0.225667	0.385667	0.7015	0.754167	0.636667	0.785	0.619833	0.411667
							Cr	0.0443333	0.0196667	0.0496667	0.0196667	0.0245	0.0173333	0.0175	0.0208333	0.0168333	0.0181667	0.0208333	0.044
							Fe	1.08667	1.18817	1.194	0.794333	0.866667	0.958833	0.898	1.104	0.7935	1.13767	1.14517	1.43883
							Ni	0.0245	0.019	0.0586667	0.0168333	0.0198333	0.0195	0.0223333	0.0223333	0.0166667	0.02	0.0178333	0.0248333
							Cu	0.538333	0.4505	0.472	0.492167	0.562	0.524667	0.508667	0.297667	0.2665	0.2635	0.292833	0.527
STATION 2				WET																				DRY
	OTF1	OTF2	OTF3	OTF4	OTF5	OTF6	OTF7	OTF8	OTF9	OTF10	OTF11	OTF12	OTF1	OTF2	OTF3	OTF4	OTF5	OTF6	OTF7	OTF8	OTF9	OTF10	OTF11	OTF12
Parameter	mean	mean	mean	mean	mean	mean	mean	mean	mean	mean	mean	mean	mean	mean	mean	mean	mean	mean	mean	mean	mean	mean	mean	mean	Mean	SD	MIN	MAX
Pb	0.008	0.00533333	0.00766667	0.008	0.00533333	0.00833333	0.00433333	0.007	0.007	0.00666667	0.002	0.018	0.006	0.007	0.00733333	0.009	0.00366667	0.003	0.003	0.00366667	0.0196667	0.0133333	0.003	0.00433333	0.00711111	0.00294444	0.002	0.0196667
Zn	0.0413333	0.0216667	0.0586667	0.095	0.115667	0.189333	0.139333	0.122	0.148667	0.0836667	0.153667	0.103333	0.152667	0.168667	0.142	0.159	0.133667	0.15	0.163333	0.28	0.23	0.23	0.257	0.24	0.149111	0.0486944	0.0216667	0.28
Cd	#DIV/0!	#DIV/0!	#DIV/0!	#DIV/0!	#DIV/0!	#DIV/0!	#DIV/0!	#DIV/0!	#DIV/0!	#DIV/0!	#DIV/0!	#DIV/0!	#DIV/0!	#DIV/0!	#DIV/0!	#DIV/0!	#DIV/0!	#DIV/0!	#DIV/0!	#DIV/0!	#DIV/0!	#DIV/0!	#DIV/0!	#DIV/0!	#DIV/0!	#DIV/0!	#DIV/0!	#DIV/0!
Cr	0.019	0.467	0.0143333	0.0193333	0.0196667	0.0213333	0.0166667	0.0276667	0.02	0.0173333	0.0233333	0.026	0.013	0.0746667	0.101333	0.0216667	0.023	0.0156667	0.0263333	0.0966667	0.089	0.025	0.023	0.0186667	0.0508194	0.0478808	0.013	0.467
Fe	0.392667	0.0253333	0.507667	0.414333	0.587667	0.6195	0.517333	0.614667	0.564333	0.507	0.551333	0.533667	0.577333	0.594667	0.581	0.543667	0.558	0.517	0.483333	0.57	0.563333	0.493333	0.473333	0.474	0.511021	0.0690156	0.0253333	0.6195
Ni	0.0296667	0.0153333	0.0336667	0.0286667	0.039	0.0316667	0.023	0.0293333	0.0246667	0.024	0.0216667	0.0226667	0.0273333	0.0293333	0.02	0.02	0.0233333	0.0226667	0.023	0.023	0.023	0.0223333	0.0263333	0.026	0.0254028	0.00391435	0.0153333	0.039
Cu	0.024	0.120667	0.0243333	0.037	0.0196667	0.024	0.0156667	0.02	0.023	0.0163333	0.0256667	0.0236667	0.022	0.02	0.023	0.018	0.0183333	0.0236667	0.0136667	0.02	0.0206667	0.0183333	0.0213333	0.0226667	0.0256528	0.00886458	0.0136667	0.120667
Pb	0.007	0.00616667	0.0075	0.0085	0.0045	0.00566667	0.00366667	0.00533333	0.0133333	0.01	0.0025	0.0111667
Zn	0.097	0.0951667	0.100333	0.127	0.124667	0.169667	0.151333	0.201	0.189333	0.156833	0.205333	0.171667
Cd	#DIV/0!	#DIV/0!	#DIV/0!	#DIV/0!	#DIV/0!	#DIV/0!	#DIV/0!	#DIV/0!	#DIV/0!	#DIV/0!	#DIV/0!	#DIV/0!
Cr	0.016	0.270833	0.0578333	0.0205	0.0213333	0.0185	0.0215	0.0621667	0.0545	0.0211667	0.0231667	0.0223333
Fe	0.485	0.31	0.544333	0.479	0.572833	0.56825	0.500333	0.592333	0.563833	0.500167	0.512333	0.503833
Ni	0.0285	0.0223333	0.0268333	0.0243333	0.0311667	0.0271667	0.023	0.0261667	0.0238333	0.0231667	0.024	0.0243333
Cu	0.023	0.0703333	0.0236667	0.0275	0.019	0.0238333	0.0146667	0.02	0.0218333	0.0173333	0.0235	0.0231667			OTF1	OTF2	OTF3	OTF4	OTF5	OTF6	OTF7	OTF8	OTF9	OTF10	OTF11	OTF12
															Pb	0.007	0.00616667	0.0075	0.0085	0.0045	0.00566667	0.00366667	0.00533333	0.0133333	0.01	0.0025	0.0111667
															Zn	0.097	0.0951667	0.100333	0.127	0.124667	0.169667	0.151333	0.201	0.189333	0.156833	0.205333	0.171667
															Cd	#DIV/0!	#DIV/0!	#DIV/0!	#DIV/0!	#DIV/0!	#DIV/0!	#DIV/0!	#DIV/0!	#DIV/0!	#DIV/0!	#DIV/0!	#DIV/0!
					Pb	Zn	Cr	Fe	Ni	Cu					Cr	0.016	0.270833	0.0578333	0.0205	0.0213333	0.0185	0.0215	0.0621667	0.0545	0.0211667	0.0231667	0.0223333
			IKH 1	0.14	0.019	0.3475	0.0443333	1.08667	0.0245	0.538333					Fe	0.485	0.31	0.544333	0.479	0.572833	0.56825	0.500333	0.592333	0.563833	0.500167	0.512333	0.503833
			IKH 2	0.14	0.0258333	0.304667	0.0196667	1.18817	0.019	0.4505					Ni	0.0285	0.0223333	0.0268333	0.0243333	0.0311667	0.0271667	0.023	0.0261667	0.0238333	0.0231667	0.024	0.0243333
			IKH 3	0.31	0.0263333	0.327667	0.0496667	1.194	0.0586667	0.472					Cu	0.023	0.0703333	0.0236667	0.0275	0.019	0.0238333	0.0146667	0.02	0.0218333	0.0173333	0.0235	0.0231667
			IKH 4	0.31	0.0148333	0.296	0.0196667	0.794333	0.0168333	0.492167
			IKH 5	0.29	0.0113333	0.225667	0.0245	0.866667	0.0198333	0.562
			IKH 6	0.31	0.022	0.385667	0.0173333	0.958833	0.0195	0.524667
			IKH 7	0.33	0.0216667	0.7015	0.0175	0.898	0.0223333	0.508667
			IKH 8	0.33	0.02	0.754167	0.0208333	1.104	0.0223333	0.297667
			IKH 9	0.27	0.0221667	0.636667	0.0168333	0.7935	0.0166667	0.2665
			IKH 10	0.2	0.0253333	0.785	0.0181667	1.13767	0.02	0.2635
			IKH 11	0.15	0.0188333	0.619833	0.0208333	1.14517	0.0178333	0.292833
			IKH 12	0.1	0.0193333	0.411667	0.044	1.43883	0.0248333	0.527

## Sheet: ANOVA Pb
	Pb
IKW	0.016
IKW	0.0216667
IKW	0.027
IKW	0.014
IKW	0.00966667
IKW	0.00766667
IKW	0.0273333
IKW	0.0253333
IKW	0.029
IKW	0.0296667
IKW	0.023
IKW	0.0226667
IKW	0.0210833
IKW	0.00569231
IKW	0.0296667
IKW	0.00766667
IKD	0.022
IKD	0.03
IKD	0.0256667
IKD	0.0156667
IKD	0.013
IKD	0.0363333
IKD	0.016
IKD	0.0146667
IKD	0.0153333
IKD	0.021
IKD	0.0146667
IKD	0.016
IKD	0.0200278
IKD	0.00536325
IKD	0.0363333
IKD	0.013
OTW	0.008
OTW	0.00533333
OTW	0.00766667
OTW	0.008
OTW	0.00533333
OTW	0.00833333
OTW	0.00433333
OTW	0.007
OTW	0.007
OTW	0.00666667
OTW	0.002
OTW	0.018
OTW	0.00730556
OTW	0.00207265
OTW	0.018
OTW	0.002
OTD	0.006
OTD	0.007
OTD	0.00733333
OTD	0.009
OTD	0.00366667
OTD	0.003
OTD	0.003
OTD	0.00366667
OTD	0.0196667
OTD	0.0133333
OTD	0.003
OTD	0.00433333
OTD	0.00691667
OTD	0.00334615
OTD	0.0196667
OTD	0.003

## Sheet: ANOVA ZN
Stations	Zn
1	0.331667
1	0.352333
1	0.147
1	0.202
1	0.197667
1	0.278
1	0.326333
1	0.251667
1	0.4
1	0.353333
1	0.273667
1	0.491667
1	0.300444
1	0.069641
1	0.491667
1	0.147
2	0.363333
2	0.257
2	0.508333
2	0.39
2	0.253667
2	0.493333
2	1.07667
2	1.25667
2	0.873333
2	1.21667
2	0.966
2	0.331667
2	0.665556
2	0.317162
2	1.25667
2	0.253667
3	0.0413333
3	0.0216667
3	0.0586667
3	0.095
3	0.115667
3	0.189333
3	0.139333
3	0.122
3	0.148667
3	0.0836667
3	0.153667
3	0.103333
3	0.106028
3	0.0357692
3	0.189333
3	0.0216667
4	0.152667
4	0.168667
4	0.142
4	0.159
4	0.133667
4	0.15
4	0.163333
4	0.28
4	0.23
4	0.23
4	0.257
4	0.24
4	0.192194
4	0.0424658
4	0.28
4	0.133667

## Sheet: ANOVA CR
Stations	Cr
1	0.071
1	0.0166667
1	0.0823333
1	0.0186667
1	0.0236667
1	0.0176667
1	0.0146667
1	0.0213333
1	0.019
1	0.0173333
1	0.024
1	0.017
1	0.0286111
1	0.0147863
1	0.0823333
1	0.0146667
2	0.0176667
2	0.0226667
2	0.017
2	0.0206667
2	0.0253333
2	0.017
2	0.0203333
2	0.0203333
2	0.0146667
2	0.019
2	0.0176667
2	0.071
2	0.0236111
2	0.00755556
2	0.071
2	0.0146667
3	0.019
3	0.467
3	0.0143333
3	0.0193333
3	0.0196667
3	0.0213333
3	0.0166667
3	0.0276667
3	0.02
3	0.0173333
3	0.0233333
3	0.026
3	0.0576389
3	0.0629786
3	0.467
3	0.0143333
4	0.013
4	0.0746667
4	0.101333
4	0.0216667
4	0.023
4	0.0156667
4	0.0263333
4	0.0966667
4	0.089
4	0.025
4	0.023
4	0.0186667
4	0.044
4	0.0285641
4	0.101333
4	0.013

## Sheet: ANOVA FE
STATIONS	Fe
1	1.134
1	1.286
1	1.15767
1	0.625333
1	0.777
1	0.874333
1	0.769333
1	0.988
1	0.727
1	1.17533
1	1.527
1	1.74367
1	1.06539
1	0.250974
1	1.74367
1	0.625333
2	1.03933
2	1.09033
2	1.23033
2	0.963333
2	0.956333
2	1.04333
2	1.02667
2	1.22
2	0.86
2	1.1
2	0.763333
2	1.134
2	1.03558
2	0.0935769
2	1.23033
2	0.763333
3	0.392667
3	0.0253333
3	0.507667
3	0.414333
3	0.587667
3	0.6195
3	0.517333
3	0.614667
3	0.564333
3	0.507
3	0.551333
3	0.533667
3	0.486292
3	0.096391
3	0.6195
3	0.0253333
4	0.577333
4	0.594667
4	0.581
4	0.543667
4	0.558
4	0.517
4	0.483333
4	0.57
4	0.563333
4	0.493333
4	0.473333
4	0.474
4	0.53575
4	0.0365769
4	0.594667
4	0.473333

## Sheet: ANOVA NI
STATION	Ni
1	0.028
1	0.018
1	0.0986667
1	0.0146667
1	0.0173333
1	0.0176667
1	0.0233333
1	0.024
1	0.0216667
1	0.0253333
1	0.0236667
1	0.0216667
1	0.0278333
1	0.0109231
1	0.0986667
1	0.0146667
2	0.021
2	0.02
2	0.0186667
2	0.019
2	0.0223333
2	0.0213333
2	0.0213333
2	0.0206667
2	0.0116667
2	0.0146667
2	0.012
2	0.028
2	0.0192222
2	0.00309402
2	0.028
2	0.0116667
3	0.0296667
3	0.0153333
3	0.0336667
3	0.0286667
3	0.039
3	0.0316667
3	0.023
3	0.0293333
3	0.0246667
3	0.024
3	0.0216667
3	0.0226667
3	0.0269444
3	0.00466667
3	0.039
3	0.0153333
4	0.0273333
4	0.0293333
4	0.02
4	0.02
4	0.0233333
4	0.0226667
4	0.023
4	0.023
4	0.023
4	0.0223333
4	0.0263333
4	0.026
4	0.0238611
4	0.00208547
4	0.0293333
4	0.02

## Sheet: ANOVA CU
STATION	Cu
1	0.572667
1	0.462
1	0.460333
1	0.555
1	0.658667
1	0.557
1	0.517333
1	0.567667
1	0.517
1	0.501
1	0.491
1	0.521333
1	0.53175
1	0.0388077
1	0.658667
1	0.460333
2	0.504
2	0.439
2	0.483667
2	0.429333
2	0.465333
2	0.492333
2	0.5
2	0.0276667
2	0.016
2	0.026
2	0.0946667
2	0.532667
2	0.334222
2	0.180393
2	0.532667
2	0.016
3	0.024
3	0.120667
3	0.0243333
3	0.037
3	0.0196667
3	0.024
3	0.0156667
3	0.02
3	0.023
3	0.0163333
3	0.0256667
3	0.0236667
3	0.0311667
3	0.0146667
3	0.120667
3	0.0156667
4	0.022
4	0.02
4	0.023
4	0.018
4	0.0183333
4	0.0236667
4	0.0136667
4	0.02
4	0.0206667
4	0.0183333
4	0.0213333
4	0.0226667
4	0.0201389
4	0.00192308
4	0.0236667
4	0.0136667

## Sheet: TOTAL MEAN
	ikhueniro
Parameter	WET	DRY	NSDWQ Limt
Pb	0.0210833	0.0200278	0.01
Zn	0.300444	0.665556	3
Cr	0.0286111	0.0236111	0.05
Fe	1.06539	1.03558	0.3
Ni	0.0278333	0.0192222	0.02
Cu	0.53175	0.334222	1
	otofur
	WET	DRY
Parameter	WET	DRY	NSDWQ Limt
Pb	0.00730556	0.00691667	0.01
Zn	0.106028	0.192194	3
Cr	0.0576389	0.044	0.05
Fe	0.486292	0.53575	0.3
Ni	0.0269444	0.0238611	0.02
Cu	0.0311667	0.0201389	1
